# Supplementary material for: An Intraoperative Telemedicine Program to Improve Perioperative Quality Measures: The ACTFAST-3 Randomized Clinical Trial
Source: PubMed Central journal article supplement (PMC10517374; doi:10.1001/jamanetworkopen.2023.32517), 2023-09-22

## Supplementary Online Content

King CR, Gregory S, Fritz BA, et al; ACTFAST Study Group. Impact of an intraoperative telemedicine program on perioperative quality measures: the ACTFAST-3 randomized clinical trial. *JAMA Netw Open*. 2023;6(9):e2332517. doi:10.1001/jamanetworkopen.2023.32517

**eTable 1.** Outcome Definitions

**eTable 2.** ACT Contact Activity

**eTable 3.** Common Alerts

**eTable 4.** Descriptive Statistics Excluding Surgeries Within 30 Days of an Index Operation

**eTable 5.** Treatment Effects Excluding Surgeries Within 30 Days of an Index Operation

**eTable 6.** Descriptive Statistics Stratified by Intervention, Ignoring Prior Treatment Assignments in Subsequent Surgeries

**eTable 7.** Treatment Effects, Ignoring Prior Treatment Assignments in Subsequent Surgeries

**eFigure 1A.** Number of Days per Month With Included Cases (ACT Staffed, Randomization Operational, Outcomes Measured)

**eFigure 1B.** Mean Number of Alerts per Case Over Time

**eFigure 1C.** Number of Contacts per Case Over Time

**eFigure 2.** Secondary and Clinical Outcomes Over Time

This supplemental material has been provided by the authors to give readers additional information about their work.

**eTable 1. Outcome Definitions**

| Hypotension                             | Duration of time with MAP < 60 mmHg                                                                                                                                                                                                                                                                                                                                                                                                                                                                                                                                                                                                                                                                                                                                                                                                                                                                                                                |      |                  |            |   |           |   |           |   |          |   |           |   |             |    |               |   |             |   |           |    |            |   |           |    |           |   |               |   |              |   |            |    |
|-----------------------------------------|----------------------------------------------------------------------------------------------------------------------------------------------------------------------------------------------------------------------------------------------------------------------------------------------------------------------------------------------------------------------------------------------------------------------------------------------------------------------------------------------------------------------------------------------------------------------------------------------------------------------------------------------------------------------------------------------------------------------------------------------------------------------------------------------------------------------------------------------------------------------------------------------------------------------------------------------------|------|------------------|------------|---|-----------|---|-----------|---|----------|---|-----------|---|-------------|----|---------------|---|-------------|---|-----------|----|------------|---|-----------|----|-----------|---|---------------|---|--------------|---|------------|----|
| Temperature monitoring                  | At least 1 documented intraop temperature (among cases > 1 hour)                                                                                                                                                                                                                                                                                                                                                                                                                                                                                                                                                                                                                                                                                                                                                                                                                                                                                   |      |                  |            |   |           |   |           |   |          |   |           |   |             |    |               |   |             |   |           |    |            |   |           |    |           |   |               |   |              |   |            |    |
| Antibiotic redosing                     | <p>All antibiotic doses followed by a redose within recommended intervals while patient is intraoperative (max 3 doses, excluding administrations with the same drug administered pre-procedure &gt; 1 doses):</p> <table border="1"> <thead> <tr> <th>Drug</th> <th>Interval (hours)</th> </tr> </thead> <tbody> <tr><td>ampicillin</td><td>2</td></tr> <tr><td>aztreonam</td><td>4</td></tr> <tr><td>cefazolin</td><td>4</td></tr> <tr><td>cefepime</td><td>4</td></tr> <tr><td>cefoxitin</td><td>2</td></tr> <tr><td>ceftriaxone</td><td>12</td></tr> <tr><td>ciprofloxacin</td><td>8</td></tr> <tr><td>clindamycin</td><td>6</td></tr> <tr><td>ertapenem</td><td>24</td></tr> <tr><td>gentamycin</td><td>8</td></tr> <tr><td>linezolid</td><td>10</td></tr> <tr><td>meropenem</td><td>2</td></tr> <tr><td>metronidazole</td><td>8</td></tr> <tr><td>piperacillin</td><td>2</td></tr> <tr><td>vancomycin</td><td>12</td></tr> </tbody> </table> | Drug | Interval (hours) | ampicillin | 2 | aztreonam | 4 | cefazolin | 4 | cefepime | 4 | cefoxitin | 2 | ceftriaxone | 12 | ciprofloxacin | 8 | clindamycin | 6 | ertapenem | 24 | gentamycin | 8 | linezolid | 10 | meropenem | 2 | metronidazole | 8 | piperacillin | 2 | vancomycin | 12 |
| Drug                                    | Interval (hours)                                                                                                                                                                                                                                                                                                                                                                                                                                                                                                                                                                                                                                                                                                                                                                                                                                                                                                                                   |      |                  |            |   |           |   |           |   |          |   |           |   |             |    |               |   |             |   |           |    |            |   |           |    |           |   |               |   |              |   |            |    |
| ampicillin                              | 2                                                                                                                                                                                                                                                                                                                                                                                                                                                                                                                                                                                                                                                                                                                                                                                                                                                                                                                                                  |      |                  |            |   |           |   |           |   |          |   |           |   |             |    |               |   |             |   |           |    |            |   |           |    |           |   |               |   |              |   |            |    |
| aztreonam                               | 4                                                                                                                                                                                                                                                                                                                                                                                                                                                                                                                                                                                                                                                                                                                                                                                                                                                                                                                                                  |      |                  |            |   |           |   |           |   |          |   |           |   |             |    |               |   |             |   |           |    |            |   |           |    |           |   |               |   |              |   |            |    |
| cefazolin                               | 4                                                                                                                                                                                                                                                                                                                                                                                                                                                                                                                                                                                                                                                                                                                                                                                                                                                                                                                                                  |      |                  |            |   |           |   |           |   |          |   |           |   |             |    |               |   |             |   |           |    |            |   |           |    |           |   |               |   |              |   |            |    |
| cefepime                                | 4                                                                                                                                                                                                                                                                                                                                                                                                                                                                                                                                                                                                                                                                                                                                                                                                                                                                                                                                                  |      |                  |            |   |           |   |           |   |          |   |           |   |             |    |               |   |             |   |           |    |            |   |           |    |           |   |               |   |              |   |            |    |
| cefoxitin                               | 2                                                                                                                                                                                                                                                                                                                                                                                                                                                                                                                                                                                                                                                                                                                                                                                                                                                                                                                                                  |      |                  |            |   |           |   |           |   |          |   |           |   |             |    |               |   |             |   |           |    |            |   |           |    |           |   |               |   |              |   |            |    |
| ceftriaxone                             | 12                                                                                                                                                                                                                                                                                                                                                                                                                                                                                                                                                                                                                                                                                                                                                                                                                                                                                                                                                 |      |                  |            |   |           |   |           |   |          |   |           |   |             |    |               |   |             |   |           |    |            |   |           |    |           |   |               |   |              |   |            |    |
| ciprofloxacin                           | 8                                                                                                                                                                                                                                                                                                                                                                                                                                                                                                                                                                                                                                                                                                                                                                                                                                                                                                                                                  |      |                  |            |   |           |   |           |   |          |   |           |   |             |    |               |   |             |   |           |    |            |   |           |    |           |   |               |   |              |   |            |    |
| clindamycin                             | 6                                                                                                                                                                                                                                                                                                                                                                                                                                                                                                                                                                                                                                                                                                                                                                                                                                                                                                                                                  |      |                  |            |   |           |   |           |   |          |   |           |   |             |    |               |   |             |   |           |    |            |   |           |    |           |   |               |   |              |   |            |    |
| ertapenem                               | 24                                                                                                                                                                                                                                                                                                                                                                                                                                                                                                                                                                                                                                                                                                                                                                                                                                                                                                                                                 |      |                  |            |   |           |   |           |   |          |   |           |   |             |    |               |   |             |   |           |    |            |   |           |    |           |   |               |   |              |   |            |    |
| gentamycin                              | 8                                                                                                                                                                                                                                                                                                                                                                                                                                                                                                                                                                                                                                                                                                                                                                                                                                                                                                                                                  |      |                  |            |   |           |   |           |   |          |   |           |   |             |    |               |   |             |   |           |    |            |   |           |    |           |   |               |   |              |   |            |    |
| linezolid                               | 10                                                                                                                                                                                                                                                                                                                                                                                                                                                                                                                                                                                                                                                                                                                                                                                                                                                                                                                                                 |      |                  |            |   |           |   |           |   |          |   |           |   |             |    |               |   |             |   |           |    |            |   |           |    |           |   |               |   |              |   |            |    |
| meropenem                               | 2                                                                                                                                                                                                                                                                                                                                                                                                                                                                                                                                                                                                                                                                                                                                                                                                                                                                                                                                                  |      |                  |            |   |           |   |           |   |          |   |           |   |             |    |               |   |             |   |           |    |            |   |           |    |           |   |               |   |              |   |            |    |
| metronidazole                           | 8                                                                                                                                                                                                                                                                                                                                                                                                                                                                                                                                                                                                                                                                                                                                                                                                                                                                                                                                                  |      |                  |            |   |           |   |           |   |          |   |           |   |             |    |               |   |             |   |           |    |            |   |           |    |           |   |               |   |              |   |            |    |
| piperacillin                            | 2                                                                                                                                                                                                                                                                                                                                                                                                                                                                                                                                                                                                                                                                                                                                                                                                                                                                                                                                                  |      |                  |            |   |           |   |           |   |          |   |           |   |             |    |               |   |             |   |           |    |            |   |           |    |           |   |               |   |              |   |            |    |
| vancomycin                              | 12                                                                                                                                                                                                                                                                                                                                                                                                                                                                                                                                                                                                                                                                                                                                                                                                                                                                                                                                                 |      |                  |            |   |           |   |           |   |          |   |           |   |             |    |               |   |             |   |           |    |            |   |           |    |           |   |               |   |              |   |            |    |
| Intraoperative blood glucose management | Failure = no insulin administered for blood glucose greater than 180 mg/dL OR no intraoperative measurement of blood glucose in patients with type 1 diabetes undergoing cases $\geq$ 1 hour OR no intraoperative measurement of blood glucose in patients with type 2 diabetes undergoing cases > 2 hours                                                                                                                                                                                                                                                                                                                                                                                                                                                                                                                                                                                                                                         |      |                  |            |   |           |   |           |   |          |   |           |   |             |    |               |   |             |   |           |    |            |   |           |    |           |   |               |   |              |   |            |    |
| Neuromuscular monitoring documentation  | Proportion of cases with a train of four documented prior to extubation if a nondepolarizing neuromuscular blocking agent was administered                                                                                                                                                                                                                                                                                                                                                                                                                                                                                                                                                                                                                                                                                                                                                                                                         |      |                  |            |   |           |   |           |   |          |   |           |   |             |    |               |   |             |   |           |    |            |   |           |    |           |   |               |   |              |   |            |    |
| Ventilator management                   | Among cases with mechanical ventilation, failure = median tidal volume more than 10 mL/kg ideal body mass                                                                                                                                                                                                                                                                                                                                                                                                                                                                                                                                                                                                                                                                                                                                                                                                                                          |      |                  |            |   |           |   |           |   |          |   |           |   |             |    |               |   |             |   |           |    |            |   |           |    |           |   |               |   |              |   |            |    |
| Volatile anesthetic utilization         | Mean fresh gas flow rates for cases with volatile anesthetic use > 80% of case duration                                                                                                                                                                                                                                                                                                                                                                                                                                                                                                                                                                                                                                                                                                                                                                                                                                                            |      |                  |            |   |           |   |           |   |          |   |           |   |             |    |               |   |             |   |           |    |            |   |           |    |           |   |               |   |              |   |            |    |

|                                   |                                                                                                                                                                                                                                            |
|-----------------------------------|--------------------------------------------------------------------------------------------------------------------------------------------------------------------------------------------------------------------------------------------|
| Postoperative acute renal failure | In first 7 postoperative days, KDIGO stage of AKI. Where baseline creatinine unavailable, age, sex, height, race, and weight normed value imputed.                                                                                         |
| Postoperative atrial fibrillation | Flowsheet records of incident atrial fibrillation in first 7 postop days, atrial fibrillation billing diagnosis not present on admission                                                                                                   |
| Postoperative respiratory failure | Any mechanical ventilation in first 7 postoperative days, excluding patients with preoperative ventilation (Epic era only)                                                                                                                 |
| Postoperative delirium            | Any positive CAM-ICU score in first 7 postoperative days, excluding patients with preoperative positive CAM-ICU in the prior 7 days.                                                                                                       |
| Intraoperative awareness          | Removed from analysis plan – not consistently evaluated                                                                                                                                                                                    |
| Surgical site infection           | Removed from analysis plan due to low data quality. Defined as billing ICD10-CM codes T81.4, K68.11, O86.0, T8[34].5, T8[23].6, T8[245].7 excluding “D” and “S” codes (subsequent encounter and sequelae) as well as present-on-admission. |
| 30-day readmission                | Admission to any BJC facility in 30 days after discharge from index procedure                                                                                                                                                              |
| 30-day mortality                  | Death recorded in first 30 postoperative days                                                                                                                                                                                              |

**eTable 2.** ACT Contact Activity

| Group                            | Intervention | Control  | Intervention | Control |
|----------------------------------|--------------|----------|--------------|---------|
| Period                           | Pre-Epic     | Pre-Epic | Epic         | Epic    |
| Number of Cases                  | 5808         | 6065     | 7172         | 7209    |
| Number of Alerts                 | 9281         | 9488     | 53644        | 53732   |
| Fraction w alert                 | 0.65         | 0.65     | 0.97         | 0.97    |
| Num w contact                    | 877          | 40       | 759          | 59      |
| Num w alert contact              | 877          | 40       | 521          | 34      |
| Num w review contact             | 0            | 0        | 367          | 31      |
| Num contact w significant issue  | 367          | 20       | 370          | 34      |
| Num contact affecting management | 387          | 20       | 216          | 11      |

**eTable 3.** Common Alerts

| MESSAGE                                           | N    | PRE-EPIC | EPIC |
|---------------------------------------------------|------|----------|------|
| MAP TRENDING DOWN. POTENTIAL HYPOTENSION.         | 9100 | 0        | 9100 |
| HIGH CUMULATIVE VASOPRESSOR BOLUS DOSE.           | 8599 | 4330     | 4269 |
| TACHYCARDIA. HR =                                 | 7121 | 3209     | 3912 |
| PONV RISK. CONSIDER TWO OR MORE ANTIEMETICS.      | 6609 | 0        | 6609 |
| NO BP MEASURED                                    | 6574 | 0        | 6574 |
| PONV RISK. [A] ADMINISTERED. CONSIDER ADDITIONAL  | 6396 | 0        | 6396 |
| HYPOTENSION: MAP =                                | 5899 | 0        | 5899 |
| TIDAL VOLUME = [A] ([B] CC/KILO OF IDEAL BODY WEI | 5803 | 1398     | 4405 |
| LOW TEMPERATURE =                                 | 5358 | 0        | 5358 |
| CONSIDER DOCUMENTING TRAIN OF FOUR.               | 4747 | 3587     | 1160 |
| TACHYCARDIA. HR =                                 | 4444 | 1950     | 2494 |
| HYPERTENSION. MAP =                               | 3968 | 0        | 3968 |
| HIGH MAC =                                        | 3776 | 0        | 3776 |
| LOW MAC =                                         | 3056 | 0        | 3056 |
| ANTIBIOTIC HAS NOT BEEN DOCUMENTED PRIOR TO...    | 2741 | 0        | 2741 |
| CUMULATIVE TIME FOR MAP < [A] = [B] MINUTES.      | 2718 | 623      | 2095 |
| LOW CO2 =                                         | 2696 | 0        | 2696 |
| LOW MAC =                                         | 2517 | 0        | 2517 |
| HYPOTENSION: MAP =                                | 2449 | 0        | 2449 |
| LOW PEEP =                                        | 2446 | 0        | 2446 |

**eTable 4.** Descriptive Statistics Excluding Surgeries Within 30 Days of an Index Operation

Stratified by intervention. P-values for quantitative variables by Mann-Whitney U, factor variables by Fisher's exact test.

|                                   | Control     | Intervention |
|-----------------------------------|-------------|--------------|
| N                                 | 12457       | 12179        |
| Age (median [IQR])                | 60 [47, 69] | 60 [47, 69]  |
| Body Mass Index (median [IQR])    | 29 [24, 34] | 29 [24, 34]  |
| Sex n (%)                         |             |              |
| Female                            | 6387 (51.3) | 6361 (52.2)  |
| Male                              | 6066 (48.7) | 5813 (47.7)  |
| Other                             | 4 (0.0)     | 5 (0.0)      |
| Race n (%)                        |             |              |
| White                             | 9585 (76.9) | 9371 (76.9)  |
| Black                             | 2516 (20.2) | 2438 (20.0)  |
| Other                             | 210 (1.7)   | 226 (1.9)    |
| Asian                             | 146 (1.2)   | 144 (1.2)    |
| Surgery Type n (%)                |             |              |
| Other                             | 2072 (16.6) | 2038 (16.7)  |
| Orthopedics                       | 1429 (11.5) | 1386 (11.4)  |
| Cardiac and Thoracic              | 1295 (10.4) | 1195 (9.8)   |
| Gynecology                        | 1379 (11.1) | 1376 (11.3)  |
| Urology                           | 1330 (10.7) | 1235 (10.1)  |
| General                           | 852 (6.8)   | 875 (7.2)    |
| Neurology                         | 852 (6.8)   | 849 (7.0)    |
| Otolaryngology                    | 838 (6.7)   | 773 (6.3)    |
| Vascular                          | 741 (5.9)   | 748 (6.1)    |
| Gastroenterology                  | 390 (3.1)   | 439 (3.6)    |
| Colorectal                        | 423 (3.4)   | 414 (3.4)    |
| Transplant                        | 376 (3.0)   | 354 (2.9)    |
| Hepatobiliary                     | 336 (2.7)   | 370 (3.0)    |
| Plastics                          | 144 (1.2)   | 127 (1.0)    |
| ASA n (%)                         |             |              |
| 1                                 | 542 (4.9)   | 548 (5.0)    |
| 2                                 | 4491 (40.2) | 4370 (39.9)  |
| 3                                 | 4984 (44.6) | 4975 (45.4)  |
| 4                                 | 1130 (10.1) | 1035 (9.4)   |
| 5                                 | 27 (0.2)    | 26 (0.2)     |
| Barthel index < 100 n (%)         | 1350 (10.8) | 1406 (11.5)  |
| Coronary Artery Disease n (%)     | 1525 (13.4) | 1464 (13.1)  |
| Congestive Heart Failure n (%)    | 1158 (10.2) | 1117 (10.0)  |
| Atrial Fibrillation n (%)         | 1024 (9.0)  | 984 (8.8)    |
| Peripheral Arterial Disease n (%) | 911 (8.0)   | 860 (7.7)    |

|                                    |             |             |
|------------------------------------|-------------|-------------|
| Diabetes Mellitus n (%)            | 2667 (27.6) | 2614 (27.6) |
| Cirrhosis = 1 (%)                  | 232 ( 2.0)  | 229 ( 2.1)  |
| Functional Capacity < 4 METs n (%) | 3078 (30.7) | 3128 (31.5) |
| Hypertension n (%)                 | 5960 (52.3) | 5824 (52.2) |
| COPD or Asthma n (%)               | 2253 (19.8) | 2176 (19.5) |
| End Stage Renal Disease n (%)      | 516 ( 4.4)  | 528 ( 4.6)  |
| Cerebrovascular Disease n (%)      | 808 ( 7.1)  | 693 ( 6.2)  |
| Current Cancer n (%)               | 2508 (22.0) | 2477 (22.2) |

**eTable 5.** Treatment Effects Excluding Surgeries Within 30 Days of an Index Operation

Coef = rate ratio for binary (n %) and ordinal (median IQR) outcomes, regression coefficient for continuous (mean SD) outcomes. CI = 95% confidence interval by GEE clustered on OR and day. AKI, delirium, respiratory failure, atrial fibrillation exclude patients with those characteristics preoperatively. AKI= acute kidney injury (KDIGO stage), TV = tidal volume. See supplemental table 1 for definitions. P-values Holm corrected in each group of outcomes (2 primary, 8 secondary, 6 clinical tests).

| Outcome                                    | Intervention      | Control           | coef (CI)           | p     |
|--------------------------------------------|-------------------|-------------------|---------------------|-------|
| <b>Primary outcomes</b>                    |                   |                   |                     |       |
| Not postop hypothermic, n (%)              | 7109/10796 (66)   | 7261/11009 (66)   | 1.00 (0.98, 1.02)   | 1     |
| Not postop hyperglycemic, n (%)            | 6923/8069 (86)    | 6989/8169 (86)    | 1.00 (0.99, 1.02)   | 1     |
| <b>Secondary outcomes</b>                  |                   |                   |                     |       |
| Glucose measurement done, n (%)            | 1258/1833 (69)    | 1189/1853 (64)    | 1.07 (1.02, 1.12)   | 0.04  |
| Intra low map minutes, mean (SD)           | 7 (17)            | 7 (18)            | -0.22 (-0.67, 0.23) | 1     |
| Temperature monitoring, n (%)              | 8185/8731 (94)    | 8336/8943 (93)    | 1.01 (1.00, 1.01)   | 1     |
| No missed antibiotics, n (%)               | 11971/12179 (98)  | 12237/12457 (98)  | 1.00 (1.00, 1.00)   | 1     |
| Insulin per clinical guidelines, n (%)     | 609/947 (64)      | 680/1015 (67)     | 0.96 (0.90, 1.02)   | 1     |
| Neuromuscular monitoring documented, n (%) | 4471/6263 (71)    | 4420/6318 (70)    | 1.02 (1.00, 1.04)   | 0.665 |
| Appropriate TV, n (%)                      | 4632/4955 (93)    | 4650/4994 (93)    | 1.00 (0.99, 1.01)   | 1     |
| Fresh gas flow L/min, mean (SD)            | 3 (1)             | 3 (1)             | -0.00 (-0.05, 0.04) | 1     |
| <b>Clinical outcomes</b>                   |                   |                   |                     |       |
| AKI stage                                  |                   |                   | 0.98 (0.88, 1.10)   | 1     |
| = 0, n (%)                                 | 10780/11479 (94%) | 11012/11738 (94%) |                     |       |
| = 1, n (%)                                 | 531/11479 (5%)    | 553/11738 (5%)    |                     |       |
| = 2, n (%)                                 | 75/11479 (1%)     | 70/11738 (1%)     |                     |       |
| = 3, n (%)                                 | 93/11479 (1%)     | 103/11738 (1%)    |                     |       |
| 30-day mortality, n (%)                    | 168/12179 (1)     | 194/12457 (2)     | 0.89 (0.72, 1.09)   | 0.996 |
| 30-day readmission, n (%)                  | 499/12179 (4)     | 441/12457 (4)     | 1.16 (1.02, 1.32)   | 0.156 |
| Delirium, n (%)                            | 195/546 (36)      | 187/543 (34)      | 1.04 (0.88, 1.22)   | 1     |
| Respiratory failure, n (%)                 | 204/10781 (2)     | 204/10946 (2)     | 1.02 (0.83, 1.24)   | 1     |
| Incident atrial fibrillation, n (%)        | 268/11053 (2)     | 307/11291 (3)     | 0.89 (0.76, 1.05)   | 0.85  |
| SSI, n/total (%)                           | 284/12179 (2)     | 306/12457 (2)     | 0.95 (0.81, 1.12)   | 0.531 |
| multipleCases, n/total (%)                 | 2336/12179 (19)   | 2410/12457 (19)   | 0.99 (0.94, 1.05)   | 0.752 |



**eTable 6.** Descriptive Statistics Stratified by Intervention, Ignoring Prior Treatment Assignments in Subsequent Surgeries

P-values for quantitative variables by Mann-Whitney U, factor variables by Fisher's exact test.

|                                   | Control      | Intervention |
|-----------------------------------|--------------|--------------|
| N                                 | 13289        | 12965        |
| Age (median [IQR])                | 60 [47, 69]  | 60 [47, 69]  |
| Body Mass Index (median [IQR])    | 28 [24, 34]  | 29 [24, 34]  |
| Sex n (%)                         |              |              |
| Female                            | 6706 (50.5)  | 6687 (51.6)  |
| Male                              | 6579 (49.5)  | 6273 (48.4)  |
| Other                             | 4 ( 0.0)     | 5 ( 0.0)     |
| Race n (%)                        |              |              |
| White                             | 10204 (76.8) | 9965 (76.9)  |
| Black                             | 2714 (20.4)  | 2613 (20.2)  |
| Other                             | 222 ( 1.7)   | 239 ( 1.8)   |
| Asian                             | 149 ( 1.1)   | 148 ( 1.1)   |
| Surgery Type n (%)                |              |              |
| Other                             | 2146 (16.1)  | 2104 (16.2)  |
| Orthopedics                       | 1520 (11.4)  | 1467 (11.3)  |
| Cardiac and Thoracic              | 1465 (11.0)  | 1359 (10.5)  |
| Gynecology                        | 1391 (10.5)  | 1396 (10.8)  |
| Urology                           | 1397 (10.5)  | 1292 (10.0)  |
| General                           | 985 ( 7.4)   | 985 ( 7.6)   |
| Neurology                         | 894 ( 6.7)   | 907 ( 7.0)   |
| Otolaryngology                    | 893 ( 6.7)   | 814 ( 6.3)   |
| Vascular                          | 795 ( 6.0)   | 800 ( 6.2)   |
| Gastroenterology                  | 455 ( 3.4)   | 517 ( 4.0)   |
| Colorectal                        | 440 ( 3.3)   | 426 ( 3.3)   |
| Transplant                        | 392 ( 2.9)   | 364 ( 2.8)   |
| Hepatobiliary                     | 342 ( 2.6)   | 379 ( 2.9)   |
| Plastics                          | 174 ( 1.3)   | 155 ( 1.2)   |
| ASA n (%)                         |              |              |
| 1                                 | 552 ( 4.6)   | 556 ( 4.8)   |
| 2                                 | 4685 (39.2)  | 4522 (38.7)  |
| 3                                 | 5380 (45.0)  | 5377 (46.0)  |
| 4                                 | 1303 (10.9)  | 1197 (10.2)  |
| 5                                 | 33 ( 0.3)    | 30 ( 0.3)    |
| Barthel index < 100 n (%)         | 1417 (10.7)  | 1476 (11.4)  |
| Coronary Artery Disease n (%)     | 1652 (13.6)  | 1595 (13.4)  |
| Congestive Heart Failure n (%)    | 1301 (10.7)  | 1244 (10.5)  |
| Atrial Fibrillation n (%)         | 1143 ( 9.4)  | 1109 ( 9.3)  |
| Peripheral Arterial Disease n (%) | 1021 ( 8.4)  | 962 ( 8.1)   |

|                                    |             |             |
|------------------------------------|-------------|-------------|
| Diabetes Mellitus n (%)            | 2889 (28.0) | 2844 (28.2) |
| Cirrhosis (%)                      | 267 ( 2.2)  | 251 ( 2.1)  |
| Functional Capacity < 4 METs n (%) | 3247 (30.3) | 3308 (31.3) |
| Hypertension n (%)                 | 6413 (52.7) | 6244 (52.5) |
| COPD or Asthma n (%)               | 2456 (20.2) | 2353 (19.8) |
| End Stage Renal Disease n (%)      | 569 ( 4.5)  | 571 ( 4.7)  |
| Cerebrovascular Disease n (%)      | 885 ( 7.3)  | 763 ( 6.4)  |
| Current Cancer n (%)               | 2627 (21.6) | 2597 (21.8) |

**eTable 7.** Treatment Effects, Ignoring Prior Treatment Assignments in Subsequent Surgeries

Coef = rate ratio for binary (n %) and ordinal (median IQR) outcomes, regression coefficient for continuous (mean SD) outcomes. CI = 95% confidence interval by GEE clustered on OR and day. AKI, delirium, respiratory failure, atrial fibrillation exclude patients with those characteristics preoperatively. AKI= acute kidney injury (KDIGO stage), TV = tidal volume. See supplemental table 1 for definitions. P-values Holm corrected in each group of outcomes.

| Outcome                                    | Intervention      | Control           | coef (CI)           | p     |
|--------------------------------------------|-------------------|-------------------|---------------------|-------|
| <b>Primary outcomes</b>                    |                   |                   |                     |       |
| Not postop hypothermic, n (%)              | 7600/11433 (66)   | 7785/11686 (67)   | 1.00 (0.98, 1.02)   | 1     |
| Not postop hyperglycemic, n (%)            | 7469/8693 (86)    | 7535/8798 (86)    | 1.00 (0.99, 1.02)   | 1     |
| <b>Secondary outcomes</b>                  |                   |                   |                     |       |
| Glucose measurement done, n (%)            | 1355/1977 (69)    | 1265/1981 (64)    | 1.07 (1.03, 1.12)   | 0.016 |
| Intra low map minutes, mean (SD)           | 7 (17)            | 7 (18)            | -0.22 (-0.66, 0.21) | 1     |
| Temperature monitoring, n (%)              | 8637/9219 (94)    | 8792/9452 (93)    | 1.01 (1.00, 1.02)   | 0.833 |
| No missed antibiotics, n (%)               | 12738/12965 (98)  | 13036/13289 (98)  | 1.00 (1.00, 1.00)   | 1     |
| Insulin per clinical guidelines, n (%)     | 648/1013 (64)     | 717/1073 (67)     | 0.96 (0.90, 1.02)   | 1     |
| Neuromuscular monitoring documented, n (%) | 4621/6577 (70)    | 4609/6670 (69)    | 1.02 (0.99, 1.04)   | 1     |
| Appropriate TV, n (%)                      | 5036/5388 (93)    | 5083/5452 (93)    | 1.00 (0.99, 1.01)   | 1     |
| Fresh gas flow L/min, mean (SD)            | 3 (1)             | 3 (1)             | -0.01 (-0.05, 0.03) | 1     |
| <b>Clinical outcomes</b>                   |                   |                   |                     |       |
| AKI stage                                  |                   |                   | 0.99 (0.89, 1.10)   | 1     |
| = 0, n (%)                                 | 11438/12177 (94%) | 11685/12448 (94%) |                     |       |
| = 1, n (%)                                 | 561/12177 (5%)    | 575/12448 (5%)    |                     |       |
| = 2, n (%)                                 | 77/12177 (1%)     | 74/12448 (1%)     |                     |       |
| = 3, n (%)                                 | 101/12177 (1%)    | 114/12448 (1%)    |                     |       |
| 30-day mortality, n (%)                    | 206/12965 (2)     | 232/13289 (2)     | 0.91 (0.76, 1.10)   | 1     |
| 30-day readmission, n (%)                  | 568/12965 (4)     | 526/13289 (4)     | 1.11 (0.98, 1.25)   | 0.576 |
| Delirium, n (%)                            | 224/637 (35)      | 210/622 (34)      | 1.04 (0.89, 1.22)   | 1     |
| Respiratory failure, n (%)                 | 236/11289 (2)     | 234/11493 (2)     | 1.03 (0.85, 1.23)   | 1     |
| Incident atrial fibrillation, n (%)        | 306/11673 (3)     | 340/11968 (3)     | 0.92 (0.79, 1.08)   | 1     |

**eFigure 1A.** Number of Days per Month With Included Cases (ACT Staffed, Randomization Operational, Outcomes Measured)

Circle = actual value, x = number of weekdays. No adjustment for holidays.

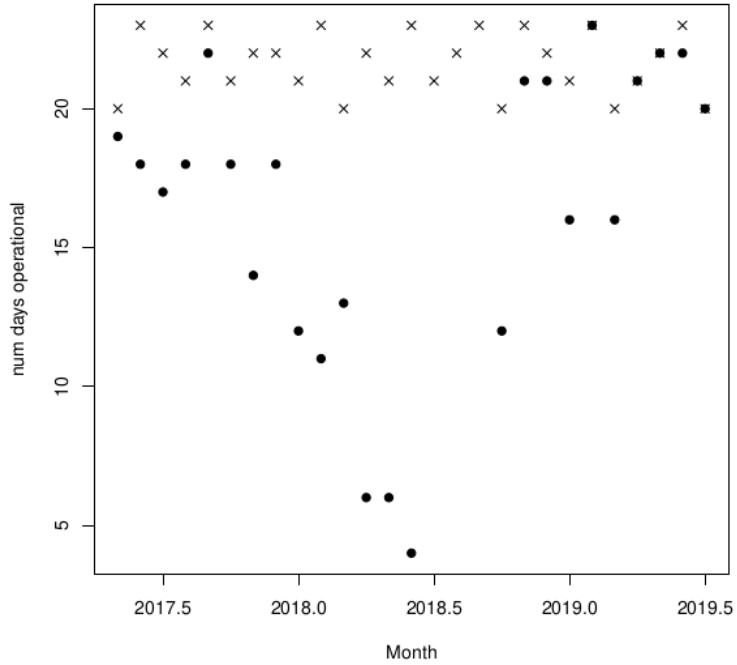

**eFigure 1B.** Mean Number of Alerts per Case Over Time

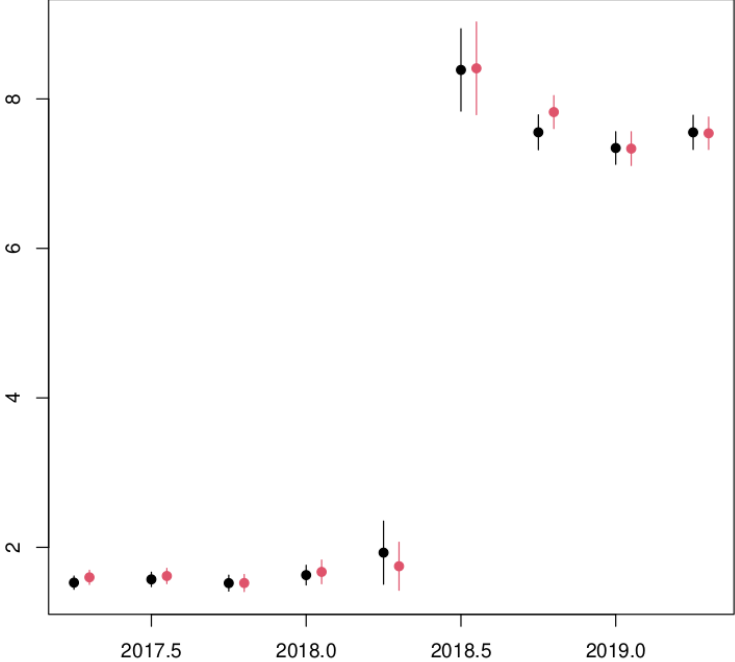

**eFigure 1C.** Number of Contacts per Case Over Time

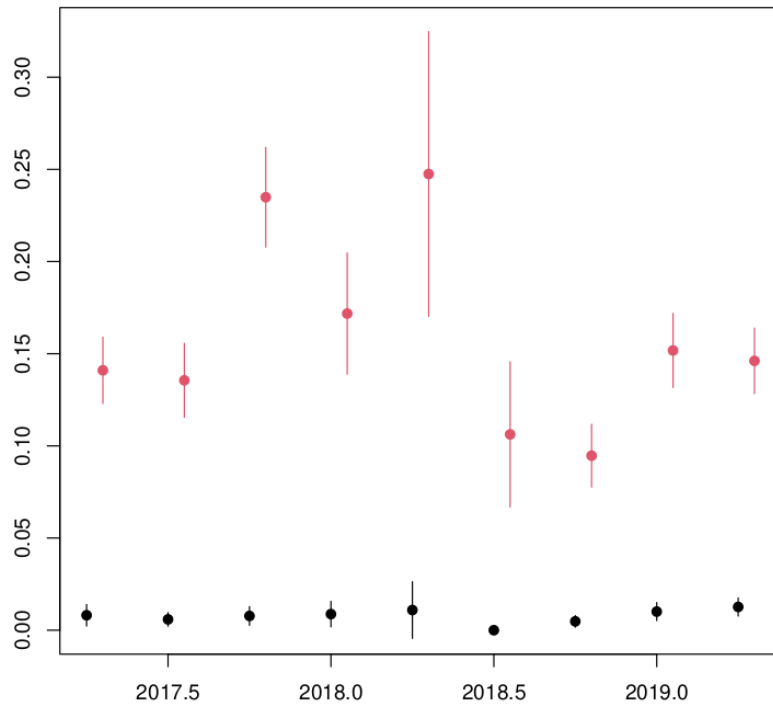

**eFigure 2. Secondary and Clinical Outcomes Over Time**

Dotted line = EHR transition. AKI\_st2 = KDIGO grade 2 or higher AKI, outcomes defined in Sup Table 1. Confidence intervals by clustered GEE with linear response on proportion or outcome.

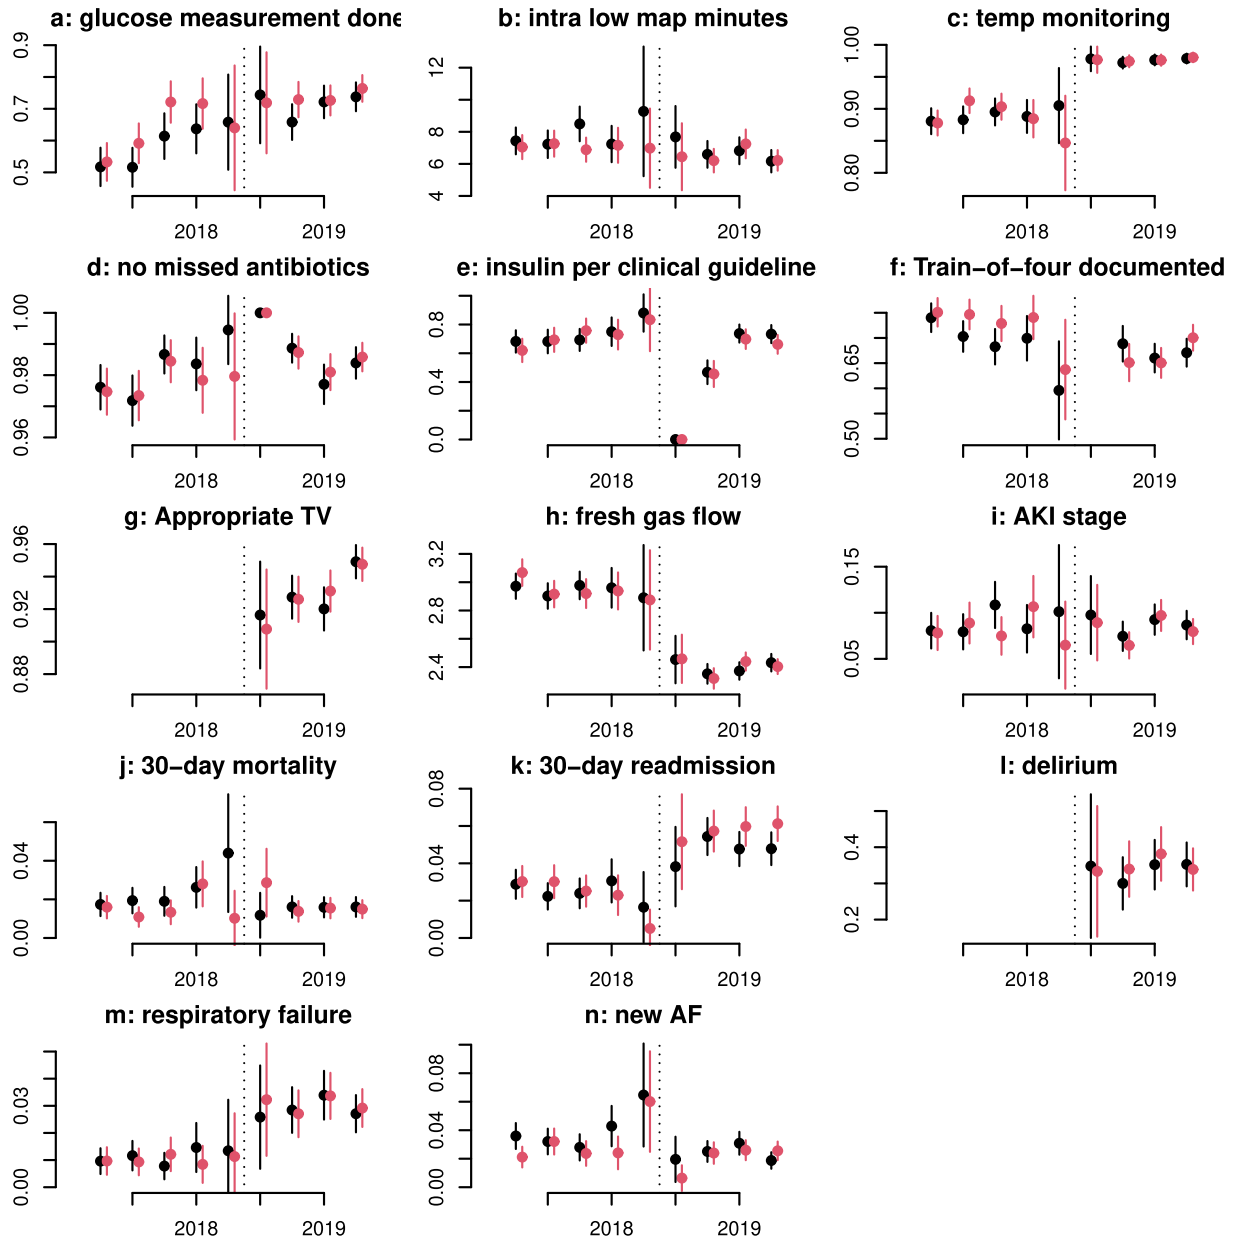

Supplement: jamanetwopen-e2332517-s002.pdf [file jamanetwopen-e2332517-s002.pdf]
