# Supplementary material for: An Intraoperative Telemedicine Program to Improve Perioperative Quality Measures: The ACTFAST-3 Randomized Clinical Trial
Source: PubMed Central journal article supplement (PMC10517374; doi:10.1001/jamanetworkopen.2023.32517), 2023-09-22
Supplement: jamanetwopen-e2332517-s003.pdf [file jamanetwopen-e2332517-s003.pdf]

\*First name, last name, and suffix (if applicable) are required and will appear in PubMed.

| <b>*Group Name(s): Members of the ACTFAST Study Group</b> |                    |                              |                  |             |                                          |                                                         |                                                                                            |
|-----------------------------------------------------------|--------------------|------------------------------|------------------|-------------|------------------------------------------|---------------------------------------------------------|--------------------------------------------------------------------------------------------|
| <b>*First Name and Middle Initial(s)</b>                  | <b>*Last Name</b>  | <b>*Suffix (eg, Jr, III)</b> | Academic Degrees | Institution | Location (city, state/province, country) | Role or Contribution, eg, chair, principal investigator | Group (if more than 1 Group listed in the byline) and/or Subgroup (eg, Steering Committee) |
| Mohamed                                                   | Abdelhack          |                              | PhD              | WUSTL       |                                          | Infrastructure team                                     |                                                                                            |
| Amrita                                                    | Aranake-Chrisinger |                              | MD               | WUSTL       |                                          | ACT Clinician                                           |                                                                                            |
| Aaron                                                     | Archer             |                              | MSN              | WUSTL       |                                          | ACT Clinician                                           |                                                                                            |
| Maureen                                                   | Arends             |                              |                  | WUSTL       |                                          | Administrative and coordination team                    |                                                                                            |
| Emily                                                     | Armstrong          |                              | BSN              | WUSTL       |                                          | ACT Clinician                                           |                                                                                            |
| Umeshkumar                                                | Athiraman          |                              | MD               | WUSTL       |                                          | ACT Clinician                                           |                                                                                            |
| Sennaraj                                                  | Balasubramanian    |                              | MD               | WUSTL       |                                          | ACT Clinician                                           |                                                                                            |
| Anchal                                                    | Bansal             |                              | BS               | WUSTL       |                                          | ACT Clinician                                           |                                                                                            |
| Kara                                                      | Battig             |                              | BSN              | WUSTL       |                                          | ACT Clinician                                           |                                                                                            |
| Danielle                                                  | Benematti          |                              | BSN              | WUSTL       |                                          | ACT Clinician                                           |                                                                                            |
| George                                                    | Benzinger          | III                          | MD, PHD          | WUSTL       |                                          | ACT Clinician                                           |                                                                                            |
| Mara                                                      | Bollini            |                              | BA, BSN, MHA     | WUSTL       |                                          | ACT Clinician                                           |                                                                                            |
| Anuradha                                                  | Borle              |                              | MD               | WUSTL       |                                          | ACT Clinician                                           |                                                                                            |
| Michael                                                   | Bottros            |                              | MD, MD           | WUSTL       |                                          | ACT Clinician                                           |                                                                                            |
| Walter                                                    | Boyle              |                              | MD               | WUSTL       |                                          | ACT Clinician                                           |                                                                                            |
| Thomas                                                    | Bozada             |                              | BSN, MS          | WUSTL       |                                          | ACT Clinician                                           |                                                                                            |
| Margaret                                                  | Bradley            |                              | BSN              | WUSTL       |                                          | ACT Clinician                                           |                                                                                            |
| BrandonUfert                                              | BrandonUfert       |                              | RN               | WUSTL       |                                          | ACT Clinician                                           |                                                                                            |
| Christina                                                 | Brown              |                              | MD               | WUSTL       |                                          | ACT Clinician                                           |                                                                                            |
| Jamie                                                     | Brown-Shpigel      |                              | MD               | WUSTL       |                                          | ACT Clinician                                           |                                                                                            |
| Jamila                                                    | Burton             |                              | BS               | WUSTL       |                                          | ACT Clinician                                           |                                                                                            |
| Megan                                                     | Carmony            |                              | MD               | WUSTL       |                                          | ACT Clinician                                           |                                                                                            |
| Kathryn                                                   | Cass               |                              | CRNA             | WUSTL       |                                          | ACT Clinician                                           |                                                                                            |
| Laura                                                     | Cavallone          |                              | MD               | WUSTL       |                                          | ACT Clinician                                           |                                                                                            |

Supplemental Online Content: Nonauthor Collaborators

\*First name, last name, and suffix (if applicable) are required and will appear in PubMed.

| *First Name and Middle Initial(s) | *Last Name   | *Suffix (eg, Jr, III) | Academic Degrees | Institution | Location (city, state/province, country) | Role or Contribution, eg, chair, principal investigator | Group (if more than 1 Group listed in the byline and/or Subgroup (eg, Steering Committee) |
|-----------------------------------|--------------|-----------------------|------------------|-------------|------------------------------------------|---------------------------------------------------------|-------------------------------------------------------------------------------------------|
| Yunwei                            | Chen         |                       | MD               | WUSTL       |                                          | ACT Clinician                                           |                                                                                           |
| Yixin                             | Chen         |                       | PHD              | WUSTL       |                                          | Infrastructure team                                     |                                                                                           |
| Han                               | Choi         |                       | MD               | WUSTL       |                                          | ACT Clinician                                           |                                                                                           |
| Marissa                           | Coggin       |                       | DNP              | WUSTL       |                                          | ACT Clinician                                           |                                                                                           |
| Zachary                           | Cohen        |                       | BSE, MD          | WUSTL       |                                          | ACT Clinician                                           |                                                                                           |
| Casey                             | Critchlow    |                       |                  | WUSTL       |                                          | Administrative and coordination team                    |                                                                                           |
| Christopher                       | Davies       |                       | MD               | WUSTL       |                                          | ACT Clinician                                           |                                                                                           |
| Christopher                       | Davis        |                       | MD               | WUSTL       |                                          | ACT Clinician                                           |                                                                                           |
| Aaron                             | Demler-Barth |                       | BSN              | WUSTL       |                                          | ACT Clinician                                           |                                                                                           |
| Ryan                              | Durk         |                       | MD               | WUSTL       |                                          | ACT Clinician                                           |                                                                                           |
| Daniel                            | Eddins       |                       | BSN              | WUSTL       |                                          | ACT Clinician                                           |                                                                                           |
| David                             | Eisenbath    |                       | BSN              | WUSTL       |                                          | ACT Clinician                                           |                                                                                           |
| Meredith                          | Ellis        |                       | RN               | WUSTL       |                                          | ACT Clinician                                           |                                                                                           |
| Daniel                            | Emmert       |                       | MD               | WUSTL       |                                          | ACT Clinician                                           |                                                                                           |
| Krisztina                         | Escallier    |                       | MD               | WUSTL       |                                          | ACT Clinician                                           |                                                                                           |
| Jane                              | Exler        |                       | BS               | WUSTL       |                                          | ACT Clinician                                           |                                                                                           |
| Mitchell                          | Fingerman    |                       | MD               | WUSTL       |                                          | ACT Clinician                                           |                                                                                           |
| Ellen                             | Fischbach    |                       | CCRP             | WUSTL       |                                          | Administrative and coordination team                    |                                                                                           |
| Elizabeth                         | Frasca       |                       | BSN              | WUSTL       |                                          | ACT Clinician                                           |                                                                                           |
| Michelle                          | Ge           |                       | MD               | WUSTL       |                                          | ACT Clinician                                           |                                                                                           |
| Jason                             | Gillihan     |                       | MD               | WUSTL       |                                          | ACT Clinician                                           |                                                                                           |
| Marie                             | Goez         |                       | DNP              | WUSTL       |                                          | ACT Clinician                                           |                                                                                           |
| Natasha                           | Goodwin      |                       | BSN              | WUSTL       |                                          | ACT Clinician                                           |                                                                                           |
| Thomas                            | Graetz       |                       | MD               | WUSTL       |                                          | ACT Clinician                                           |                                                                                           |
|                                   |              |                       |                  |             |                                          |                                                         |                                                                                           |
| Ryan                              | Guffey       |                       | MD               | WUSTL       |                                          | ACT Clinician                                           |                                                                                           |
| Shelly                            | Gupta        |                       | BA               | WUSTL       |                                          | ACT Clinician                                           |                                                                                           |
| Katharine                         | Gurba        |                       | MD               | WUSTL       |                                          | ACT Clinician                                           |                                                                                           |
| Kelsey                            | Gutesa       |                       | BSN              | WUSTL       |                                          | ACT Clinician                                           |                                                                                           |

Supplemental Online Content: Nonauthor Collaborators

\*First name, last name, and suffix (if applicable) are required and will appear in PubMed.

| *First Name and Middle Initial(s) | *Last Name            | *Suffix (eg, Jr, III) | Academic Degrees | Institution | Location (city, state/province, country) | Role or Contribution, eg, chair, principal investigator | Group (if more than 1 Group listed in the byline) and/or Subgroup (eg, Steering Committee) |
|-----------------------------------|-----------------------|-----------------------|------------------|-------------|------------------------------------------|---------------------------------------------------------|--------------------------------------------------------------------------------------------|
| Tracey                            | Guthrie               |                       | BSN, CCRC        | WUSTL       |                                          | ACT Clinician                                           |                                                                                            |
| Michael                           | Hakim                 |                       | MD               | WUSTL       |                                          | ACT Clinician                                           |                                                                                            |
| Charles                           | Hantler               |                       | MD               | WUSTL       |                                          | ACT Clinician                                           |                                                                                            |
| Peter                             | Haw                   |                       | BSN              | WUSTL       |                                          | ACT Clinician                                           |                                                                                            |
| Hilary                            | Heeger                |                       | DNP              | WUSTL       |                                          | ACT Clinician                                           |                                                                                            |
| Erin                              | Herrera               |                       | MSN              | WUSTL       |                                          | ACT Clinician                                           |                                                                                            |
| Alex                              | Hincker               |                       | MD               | WUSTL       |                                          | ACT Clinician                                           |                                                                                            |
| Robert                            | Hovis                 |                       | CRNA             | WUSTL       |                                          | ACT Clinician                                           |                                                                                            |
| Gary                              | Hubbard               |                       | MS               | WUSTL       |                                          | ACT Clinician                                           |                                                                                            |
| Rocco                             | Hueneke               |                       | MD               | WUSTL       |                                          | ACT Clinician                                           |                                                                                            |
| Mark                              | Ingram                |                       | MSN              | WUSTL       |                                          | ACT Clinician                                           |                                                                                            |
| Zahid                             | Iqbal                 |                       | MD               | WUSTL       |                                          | ACT Clinician                                           |                                                                                            |
| Susan                             | Ironstone             |                       | MD               | WUSTL       |                                          | ACT Clinician                                           |                                                                                            |
| Kyle                              | Jacobsen              |                       | MD               | WUSTL       |                                          | ACT Clinician                                           |                                                                                            |
| Nisha                             | Jain                  |                       | MD               | WUSTL       |                                          | ACT Clinician                                           |                                                                                            |
| Bassel                            | Kadi                  |                       | MD               | WUSTL       |                                          | ACT Clinician                                           |                                                                                            |
| Ivan                              | Kangrga               |                       | MD               | WUSTL       |                                          | ACT Clinician                                           |                                                                                            |
| Menelaos                          | Karanikolas           |                       | MD               | WUSTL       |                                          | ACT Clinician                                           |                                                                                            |
| Bridget                           | Kinealy               |                       | BSN              | WUSTL       |                                          | ACT Clinician                                           |                                                                                            |
| Mary                              | Kinworthy             |                       | BSN              | WUSTL       |                                          | ACT Clinician                                           |                                                                                            |
| Holly                             | Kirkpatrick           |                       | BSN              | WUSTL       |                                          | ACT Clinician                                           |                                                                                            |
| Esad                              | Kiveric               |                       | MD               | WUSTL       |                                          | ACT Clinician                                           |                                                                                            |
| Andrea                            | Knibb                 |                       | BSN              | WUSTL       |                                          | ACT Clinician                                           |                                                                                            |
| Justin                            | Knittel               |                       | MD               | WUSTL       |                                          | ACT Clinician                                           |                                                                                            |
| Andreas                           | Kokefer               |                       | MD               | WUSTL       |                                          | ACT Clinician                                           |                                                                                            |
| Helga                             | Koman                 |                       | MD               | WUSTL       |                                          | ACT Clinician                                           |                                                                                            |
| Joseph                            | Kras                  |                       | DDS, MD          | WUSTL       |                                          | ACT Clinician                                           |                                                                                            |
| Kristin                           | Kraus                 |                       | RN               | WUSTL       |                                          | ACT Clinician                                           |                                                                                            |
| Anand                             | Lakshminarasim hachar |                       | MD, MD           | WUSTL       |                                          | ACT Clinician                                           |                                                                                            |

Supplemental Online Content: Nonauthor Collaborators

\*First name, last name, and suffix (if applicable) are required and will appear in PubMed.

| *First Name and Middle Initial(s) | *Last Name        | *Suffix (eg, Jr, III) | Academic Degrees | Institution | Location (city, state/province, country) | Role or Contribution, eg, chair, principal investigator | Group (if more than 1 Group listed in the byline) and/or Subgroup (eg, Steering Committee) |
|-----------------------------------|-------------------|-----------------------|------------------|-------------|------------------------------------------|---------------------------------------------------------|--------------------------------------------------------------------------------------------|
| Joseph                            | Larese            |                       | MD               | WUSTL       |                                          | ACT Clinician                                           |                                                                                            |
| Chakrapol                         | Lattanand         |                       | MD               | WUSTL       |                                          | ACT Clinician                                           |                                                                                            |
| Aparna                            | Malshet Casarella |                       | Bs               | WUSTL       |                                          | ACT Clinician                                           |                                                                                            |
| Jonathan                          | Mathew            |                       | MD               | WUSTL       |                                          | ACT Clinician                                           |                                                                                            |
| Hannah                            | Maybrier          |                       | BS               | WUSTL       |                                          | Administrative and coordination team                    |                                                                                            |
| Peter                             | McAvity           |                       | MS               | WUSTL       |                                          | ACT Clinician                                           |                                                                                            |
| Alyssa                            | McClellan         |                       | BSN              | WUSTL       |                                          | ACT Clinician                                           |                                                                                            |
| Jacob                             | McDowell          |                       | MD               | WUSTL       |                                          | ACT Clinician                                           |                                                                                            |
| Heather                           | McKenzie          |                       | MD               | WUSTL       |                                          | ACT Clinician                                           |                                                                                            |
| Alicia                            | Meng              |                       |                  | WUSTL       |                                          | Study Coordinator                                       |                                                                                            |
| Angela                            | Mickle            |                       | MS               | WUSTL       |                                          | ACT Clinician                                           |                                                                                            |
| Melissa                           | Milbrandt         |                       |                  | WUSTL       |                                          | Administrative and coordination team                    |                                                                                            |
| Preet                             | Mohinder Singh    |                       | MD               | WUSTL       |                                          | ACT Clinician                                           |                                                                                            |
| Alexander                         | Mohrmann          |                       | BSN              | WUSTL       |                                          | ACT Clinician                                           |                                                                                            |
| David                             | Monks             |                       | MBChB            | WUSTL       |                                          | ACT Clinician                                           |                                                                                            |
| Arianna                           | Montes de Oca     |                       | MD               | WUSTL       |                                          | Study Coordinator                                       |                                                                                            |
| Teresa                            | Murray-Torres     |                       | MD               | WUSTL       |                                          | ACT Clinician                                           |                                                                                            |
| Khatera                           | Najrabi           |                       | BSN              | WUSTL       |                                          | ACT Clinician                                           |                                                                                            |
| Lauren                            | Nowakowski        |                       |                  | WUSTL       |                                          | Research assistant                                      |                                                                                            |
| Ifeanyi                           | Nwokeabia         |                       | MD               | WUSTL       |                                          | ACT Clinician                                           |                                                                                            |
| Jordan                            | Oberhaus          |                       | BA               | WUSTL       |                                          | ACT Clinician                                           |                                                                                            |
| Ekua                              | Owusu-Bediako     |                       | MD               | WUSTL       |                                          | ACT Clinician                                           |                                                                                            |
| Daniel                            | Park              |                       | BA               | WUSTL       |                                          | ACT Clinician                                           |                                                                                            |
| Aamil                             | Patel             |                       |                  | WUSTL       |                                          | Research assistant                                      |                                                                                            |
| Sarah                             | Perez             |                       | CRNA             | WUSTL       |                                          | ACT Clinician                                           |                                                                                            |

## Supplemental Online Content: Nonauthor Collaborators

\*First name, last name, and suffix (if applicable) are required and will appear in PubMed.

| *First Name and Middle Initial(s) | *Last Name   | *Suffix (eg, Jr, III) | Academic Degrees | Institution | Location (city, state/province, country) | Role or Contribution, eg, chair, principal investigator | Group (if more than 1 Group listed in the byline) and/or Subgroup (eg, Steering Committee) |
|-----------------------------------|--------------|-----------------------|------------------|-------------|------------------------------------------|---------------------------------------------------------|--------------------------------------------------------------------------------------------|
| Caroline                          | Phillips     |                       | MA               | WUSTL       |                                          | ACT Clinician                                           |                                                                                            |
| David                             | Potter       |                       | BSN, MBA         | WUSTL       |                                          | ACT Clinician                                           |                                                                                            |
| Debra                             | Pulley       |                       | MD               | WUSTL       |                                          | ACT Clinician                                           |                                                                                            |
| Govind                            | Rangrass     |                       | MD               | WUSTL       |                                          | ACT Clinician                                           |                                                                                            |
| Janavi                            | Rao          |                       | MD               | WUSTL       |                                          | ACT Clinician                                           |                                                                                            |
| Rashmi                            | Rathor       |                       | MD               | WUSTL       |                                          | ACT Clinician                                           |                                                                                            |
| Isabella                          | Riordan      |                       | MD               | WUSTL       |                                          | ACT Clinician                                           |                                                                                            |
| Isabella                          | Riordan      |                       | MD               | WUSTL       |                                          | ACT Clinician                                           |                                                                                            |
| Cameron                           | Ritter       |                       | MS, BSN          | WUSTL       |                                          | ACT Clinician                                           |                                                                                            |
| Evan                              | Roller       |                       | MD               | WUSTL       |                                          | ACT Clinician                                           |                                                                                            |
| Martha                            | Sabino       |                       |                  | WUSTL       |                                          | ACT Clinician                                           |                                                                                            |
| Matthew                           | Sanzalone    |                       | MD               | WUSTL       |                                          | ACT Clinician                                           |                                                                                            |
| Elvira                            | Sayfutdinova |                       | BSN              | WUSTL       |                                          | ACT Clinician                                           |                                                                                            |
| Craig                             | Schadler     |                       | BSN              | WUSTL       |                                          | ACT Clinician                                           |                                                                                            |
| Elizabeth                         | Schappe      |                       | MS               | WUSTL       |                                          | ACT Clinician                                           |                                                                                            |
| Alexandra                         | Schatz       |                       | MSN              | WUSTL       |                                          | ACT Clinician                                           |                                                                                            |
| Anne                              | Sebastiani   |                       | MD               | WUSTL       |                                          | ACT Clinician                                           |                                                                                            |
| Kimberly                          | Seiber       |                       | MSN              | WUSTL       |                                          | ACT Clinician                                           |                                                                                            |
| Anshuman                          | Sharma       |                       | MD               | WUSTL       |                                          | ACT Clinician                                           |                                                                                            |
| Sarah                             | Sillery      |                       | MSN              | WUSTL       |                                          | ACT Clinician                                           |                                                                                            |
| Kate                              | Silver       |                       | MSN              | WUSTL       |                                          | ACT Clinician                                           |                                                                                            |
| Susan                             | Siraco       |                       | BA               | WUSTL       |                                          | ACT Clinician                                           |                                                                                            |
| Melanie                           | Somercik     |                       | MSN              | WUSTL       |                                          | ACT Clinician                                           |                                                                                            |
| Pratyush                          | Sontha       |                       | BA               | WUSTL       |                                          | ACT Clinician                                           |                                                                                            |
| James                             | Spencer      |                       | BS               | WUSTL       |                                          | ACT Clinician                                           |                                                                                            |
| Erika                             | Spencer      |                       | MS               | WUSTL       |                                          | ACT Clinician                                           |                                                                                            |
| Tracey                            | Stevens      |                       | MD               | WUSTL       |                                          | ACT Clinician                                           |                                                                                            |
| Jasmin                            | Swaniker     |                       | MD               | WUSTL       |                                          | ACT Clinician                                           |                                                                                            |
| Martha                            | Szabo        |                       | MD               | WUSTL       |                                          | ACT Clinician                                           |                                                                                            |
| Raghu                             | Terkonda     |                       | MD               | WUSTL       |                                          | ACT Clinician                                           |                                                                                            |

Supplemental Online Content: Nonauthor Collaborators

\*First name, last name, and suffix (if applicable) are required and will appear in PubMed.

| *First Name and Middle Initial(s) | *Last Name  | *Suffix (eg, Jr, III) | Academic Degrees                    | Institution | Location (city, state/province, country) | Role or Contribution, eg, chair, principal investigator | Group (if more than 1 Group listed in the byline) and/or Subgroup (eg, Steering Committee) |
|-----------------------------------|-------------|-----------------------|-------------------------------------|-------------|------------------------------------------|---------------------------------------------------------|--------------------------------------------------------------------------------------------|
| Carolyn                           | Thai        |                       | MD                                  | WUSTL       |                                          | ACT Clinician                                           |                                                                                            |
| Marko                             | Todorovic   |                       | MD                                  | WUSTL       |                                          | ACT Clinician                                           |                                                                                            |
| Brian                             | Tolly       |                       | MD                                  | WUSTL       |                                          | ACT Clinician                                           |                                                                                            |
| Emma                              | Trammel     |                       | BS                                  | WUSTL       |                                          | ACT Clinician                                           |                                                                                            |
| Sandhya                           | Tripathi    |                       | PhD                                 | WUSTL       |                                          | Infrastructure Team                                     |                                                                                            |
| Lisa                              | Tseng       |                       | MD                                  | WUSTL       |                                          | ACT Clinician                                           |                                                                                            |
| Bradley                           | Uding       |                       | BS                                  | WUSTL       |                                          | ACT Clinician                                           |                                                                                            |
| Ravi                              | Upadhyayula |                       | BS                                  | WUSTL       |                                          | ACT Clinician                                           |                                                                                            |
| Swarup                            | Varaday     |                       | MBBS,FRC A(UK),FCA RSI(IRELAND), MD | WUSTL       |                                          | ACT Clinician                                           |                                                                                            |
| William                           | Varnum      |                       | MSN                                 | WUSTL       |                                          | ACT Clinician                                           |                                                                                            |
| Minna                             | Wang        |                       | MD                                  | WUSTL       |                                          | ACT Clinician                                           |                                                                                            |
| Sarah                             | Watkins     |                       | BSN                                 | WUSTL       |                                          | ACT Clinician                                           |                                                                                            |
| Mark                              | Willingham  |                       | BS                                  | WUSTL       |                                          | ACT Clinician                                           |                                                                                            |
| William                           | Wise        |                       | MSN                                 | WUSTL       |                                          | ACT Clinician                                           |                                                                                            |
| Rachel                            | Wolfe       |                       | PharmD                              | WUSTL       |                                          | Protocol development                                    |                                                                                            |
| Maxim                             | Wolfson     |                       | BS                                  | WUSTL       |                                          | ACT Clinician                                           |                                                                                            |
| Hannah                            | Woodstock   |                       | BSN                                 | WUSTL       |                                          | ACT Clinician                                           |                                                                                            |
| Randy                             | Wright      |                       | BA                                  | WUSTL       |                                          | ACT Clinician                                           |                                                                                            |
| Katie                             | Yang        |                       | MD                                  | WUSTL       |                                          | ACT Clinician                                           |                                                                                            |
| Branden                           | Yee         |                       | BA, MD, MPH                         | WUSTL       |                                          | ACT Clinician                                           |                                                                                            |
| Jennifer                          | Yuan        |                       | MD                                  | WUSTL       |                                          | ACT Clinician                                           |                                                                                            |
| Paul                              | Zanaboni    |                       | PHD, MD, PhD                        | WUSTL       |                                          | ACT Clinician                                           |                                                                                            |
| Jessica                           | Zenga       |                       | MD                                  | WUSTL       |                                          | ACT Clinician                                           |                                                                                            |

Supplemental Online Content: Nonauthor Collaborators

\*First name, last name, and suffix (if applicable) are required and will appear in PubMed.

| <b>*First Name and Middle Initial(s)</b> | <b>*Last Name</b> | <b>*Suffix (eg, Jr, III)</b> | Academic Degrees | Institution | Location (city, state/province, country) | Role or Contribution, eg, chair, principal investigator | Group (if more than 1 Group listed in the byline) and/or Subgroup (eg, Steering Committee) |
|------------------------------------------|-------------------|------------------------------|------------------|-------------|------------------------------------------|---------------------------------------------------------|--------------------------------------------------------------------------------------------|
| James                                    | Zhang             |                              | MD               | WUSTL       |                                          | ACT Clinician                                           |                                                                                            |
| Tianyang                                 | Zheng             |                              | BS               | WUSTL       |                                          | Research assistant                                      |                                                                                            |
| Nicholas                                 | Zimick            |                              | MD               | WUSTL       |                                          | ACT Clinician                                           |                                                                                            |
| Joshua                                   | Zwingelberg       |                              | MD               | WUSTL       |                                          | ACT Clinician                                           |                                                                                            |
