# Supplementary material for: An Intraoperative Telemedicine Program to Improve Perioperative Quality Measures: The ACTFAST-3 Randomized Clinical Trial
Source: PubMed Central journal article supplement (PMC10517374; doi:10.1001/jamanetworkopen.2023.32517), 2023-09-22
Supplement: jamanetwopen-e2332517-s004.pdf [file jamanetwopen-e2332517-s004.pdf]

## Data Sharing Statement

King. Effect of an Intraoperative Telemedicine Program on Perioperative Quality Measures. *JAMA Netw Open*. Published September 22, 2023. doi:10.1001/jamanetworkopen.2023.32517

### Data

**Data available:** No

### Additional Information

**Explanation for why data not available:** Because the primary analysis depends on dates finer than 1 year, it is not HIPAA de-identified. Code and aggregated data will be shared.
